# Supplementary material for: Silaimidazolium and silaimidazolidinium ions
Source: Royal Society of Chemistry journal article supplement (doi:10.1039/c0dt00313a), 2010-01-01
Supplement: c0dt00313a.pdf [file c0dt00313a.pdf]

## Electronic Supporting Information for

### Silaimidazolium and Silaimidazolidinium ions

*Annemarie Schäfer, André Schäfer and Thomas Müller\**

|                                                                                                           |       |
|-----------------------------------------------------------------------------------------------------------|-------|
| Calculated absolute energies Table S1.                                                                    | p. 2. |
| Correlation between $\delta^{29}\text{Si}^{\text{theo}}$ / $\delta^{29}\text{Si}^{\text{exp}}$            | p. 3. |
| Cartesian Coordinates of cpds <b>3</b> , <b>4</b> , <b>7a</b> , <b>c</b> , <b>d</b> , <b>f</b> , <b>8</b> | p. 4  |

Table S1. Calculated absolute electronic energies, E, and free energies G298 of cations and carbene analogues at different levels of theory (in Hartree). Number of imaginary frequencies given in parentheses, Zero point vibrational energies in italics (in kJ mol<sup>-1</sup>).

| cpd                                 | E<br>B3LYP/<br>6-31G(d)           | G298<br>B3LYP/<br>6-31G(d) | E<br>B3LYP/<br>6-311G(2d,p)//<br>B3LYP/6-31G(d) | E<br>B3LYP/<br>6-311+G(d,p)       |
|-------------------------------------|-----------------------------------|----------------------------|-------------------------------------------------|-----------------------------------|
| <b>3a</b>                           | -792.13968<br>(0), <i>766.6</i>   | -791.88859                 | -792.30919                                      |                                   |
| <b>3c</b>                           | -1411.49795<br>(0), <i>1489.4</i> | -1410.99567                | -1411.82883                                     | -1411.80905<br>(0), <i>1475.7</i> |
| <b>4</b>                            | -793.33787<br>(0), <i>628.9</i>   | -793.06356                 | -793.50918                                      |                                   |
| <b>7a</b>                           | -1319.13441<br>(0), <i>1298.3</i> | -1318.69579                | -1319.39986                                     |                                   |
| <b>7c</b>                           | -1938.49634<br>(0), <i>2018.9</i> | -1937.80832                | -1938.92271                                     | -1938.89293                       |
| <b>7d</b>                           | -1437.06088<br>(0), <i>1522.8</i> | -1436.53991                | -1437.35807                                     | -1437.33988                       |
| <b>7f</b>                           | -2056.42575<br>(0), <i>2246.0</i> | -2055.65048                | -2056.88405                                     | -2056.85268                       |
| <b>8a</b>                           | -1320.33434<br>(0), <i>1361.0</i> | -1319.87118                | -1320.60226                                     |                                   |
| <b>8b</b>                           | -1438.26016<br>(0), <i>1587.6</i> | -1437.71432                | -1438.56003                                     |                                   |
| <b>SiEt<sub>3</sub><sup>+</sup></b> | -526.91931<br>(0), <i>519.2</i>   | -526.75816                 | -527.01991                                      |                                   |
| <b>SiPr<sub>3</sub><sup>+</sup></b> | -644.85748<br>(0), <i>743.6</i>   | -644.61739                 | -644.98978                                      |                                   |

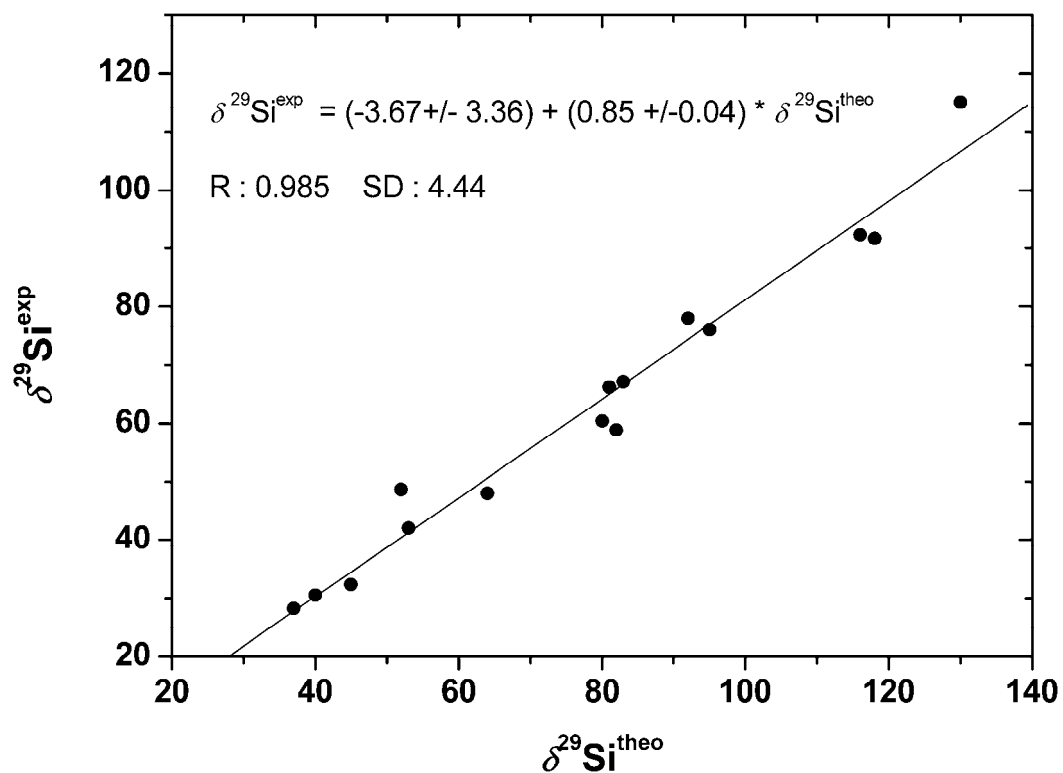

Figure S1. Correlation between calculated  $^{29}\text{Si}$  NMR chemical shifts,  $\delta^{29}\text{Si}^{\text{theo}}$  (GIAO/B3LYP/6-311G(2d,p)//B3LYP/6-31G(d)) and experimentally determined  $^{29}\text{Si}$  NMR chemical shift  $\delta^{29}\text{Si}^{\text{exp}}$  (benzene- $d_6$ , 300K) for silylenes **3**, **4** and silylium ions **7**, **8**.

3a B3LYP/6-31G(d)

Standard orientation:

| Center Number | Atomic Number | Atomic Type | Coordinates (Angstroms) |           |           |
|---------------|---------------|-------------|-------------------------|-----------|-----------|
|               |               |             | X                       | Y         | Z         |
| 1             | 14            | 0           | -0.000043               | 1.184199  | -0.000258 |
| 2             | 7             | 0           | -1.236571               | -0.111154 | -0.000133 |
| 3             | 7             | 0           | 1.236545                | -0.111109 | -0.000182 |
| 4             | 6             | 0           | -0.677992               | -1.382130 | -0.000319 |
| 5             | 6             | 0           | 0.677970                | -1.382111 | -0.000217 |
| 6             | 1             | 0           | -1.294061               | -2.272315 | -0.000351 |
| 7             | 1             | 0           | 1.294060                | -2.272275 | 0.000032  |
| 8             | 6             | 0           | -2.715730               | 0.039202  | 0.000090  |
| 9             | 6             | 0           | 2.715727                | 0.039235  | 0.000063  |
| 10            | 6             | 0           | -3.304318               | -0.617951 | 1.265837  |
| 11            | 1             | 0           | -2.885561               | -0.155590 | 2.165943  |
| 12            | 1             | 0           | -4.393169               | -0.494509 | 1.288054  |
| 13            | 1             | 0           | -3.089376               | -1.690774 | 1.304598  |
| 14            | 6             | 0           | -3.304687               | -0.617353 | -1.265776 |
| 15            | 1             | 0           | -3.090187               | -1.690247 | -1.304999 |
| 16            | 1             | 0           | -4.393497               | -0.493504 | -1.287693 |
| 17            | 1             | 0           | -2.885975               | -0.154819 | -2.165817 |
| 18            | 6             | 0           | -3.084890               | 1.531324  | 0.000402  |
| 19            | 1             | 0           | -2.694534               | 2.042408  | -0.886118 |
| 20            | 1             | 0           | -4.175253               | 1.637681  | 0.000486  |
| 21            | 1             | 0           | -2.694465               | 2.042118  | 0.887059  |
| 22            | 6             | 0           | 3.304238                | -0.617520 | 1.266012  |
| 23            | 1             | 0           | 4.393102                | -0.494162 | 1.288105  |
| 24            | 1             | 0           | 2.885571                | -0.154769 | 2.165954  |
| 25            | 1             | 0           | 3.089199                | -1.690312 | 1.305164  |
| 26            | 6             | 0           | 3.085093                | 1.531350  | -0.000096 |
| 27            | 1             | 0           | 4.175473                | 1.637646  | 0.000409  |
| 28            | 1             | 0           | 2.695178                | 2.042100  | -0.886997 |
| 29            | 1             | 0           | 2.694335                | 2.042561  | 0.886169  |
| 30            | 6             | 0           | 3.304660                | -0.617942 | -1.265466 |
| 31            | 1             | 0           | 4.393524                | -0.494567 | -1.287233 |
| 32            | 1             | 0           | 3.089692                | -1.690764 | -1.304416 |
| 33            | 1             | 0           | 2.886300                | -0.155486 | -2.165708 |

3c B3LYP/6-31G(d)

Standard orientation:

| Center Number | Atomic Number | Atomic Type | Coordinates (Angstroms) |           |           |
|---------------|---------------|-------------|-------------------------|-----------|-----------|
|               |               |             | X                       | Y         | Z         |
| 1             | 14            | 0           | -0.000018               | -0.000002 | -1.085896 |
| 2             | 7             | 0           | -1.222703               | -0.000088 | 0.220578  |
| 3             | 7             | 0           | 1.222694                | 0.000026  | 0.220548  |
| 4             | 6             | 0           | -0.678893               | -0.000077 | 1.501856  |
| 5             | 6             | 0           | 0.678904                | -0.000018 | 1.501844  |
| 6             | 1             | 0           | -1.324581               | -0.000130 | 2.371234  |
| 7             | 1             | 0           | 1.324614                | -0.000004 | 2.371205  |
| 8             | 6             | 0           | -2.652130               | 0.000013  | 0.048663  |
| 9             | 6             | 0           | -3.339702               | -1.231820 | -0.039022 |
| 10            | 6             | 0           | -4.725939               | -1.203271 | -0.235241 |
| 11            | 6             | 0           | -5.416807               | 0.000213  | -0.335875 |
| 12            | 6             | 0           | -4.725792               | 1.203589  | -0.235084 |
| 13            | 6             | 0           | -3.339544               | 1.231933  | -0.038881 |
| 14            | 1             | 0           | -5.271347               | -2.140039 | -0.311611 |
| 15            | 1             | 0           | -6.492732               | 0.000287  | -0.490364 |
| 16            | 1             | 0           | -5.271071               | 2.140445  | -0.311327 |
| 17            | 6             | 0           | 2.652121                | -0.000020 | 0.048637  |
| 18            | 6             | 0           | 3.339651                | 1.231823  | -0.039100 |
| 19            | 6             | 0           | 4.725903                | 1.203311  | -0.235280 |
| 20            | 6             | 0           | 5.416813                | -0.000147 | -0.335831 |
| 21            | 6             | 0           | 4.725831                | -1.203548 | -0.234984 |
| 22            | 6             | 0           | 3.339589                | -1.231925 | -0.038816 |
| 23            | 1             | 0           | 5.271277                | 2.140099  | -0.311672 |
| 24            | 1             | 0           | 6.492742                | -0.000203 | -0.490289 |
| 25            | 1             | 0           | 5.271154                | -2.140385 | -0.311152 |
| 26            | 6             | 0           | -2.625503               | -2.575999 | 0.069090  |
| 27            | 1             | 0           | -1.570725               | -2.377694 | 0.278477  |
| 28            | 6             | 0           | -2.625250               | 2.576019  | 0.069573  |
| 29            | 1             | 0           | -1.570426               | 2.377582  | 0.278600  |
| 30            | 6             | 0           | -2.691217               | -3.357616 | -1.257454 |
| 31            | 1             | 0           | -2.254080               | -2.779889 | -2.079129 |
| 32            | 1             | 0           | -2.139695               | -4.301952 | -1.174086 |
| 33            | 1             | 0           | -3.725690               | -3.598357 | -1.530403 |
| 34            | 6             | 0           | -3.169154               | -3.421954 | 1.236785  |
| 35            | 1             | 0           | -2.595133               | -4.351330 | 1.332272  |
| 36            | 1             | 0           | -3.099118               | -2.880505 | 2.186735  |
| 37            | 1             | 0           | -4.219829               | -3.696670 | 1.086107  |
| 38            | 6             | 0           | -3.168597               | 3.421406  | 1.237835  |
| 39            | 1             | 0           | -3.098166               | 2.879530  | 2.187512  |
| 40            | 1             | 0           | -2.594659               | 4.350809  | 1.333548  |
| 41            | 1             | 0           | -4.219366               | 3.696026  | 1.087632  |
| 42            | 6             | 0           | -2.691276               | 3.358282  | -1.256574 |
| 43            | 1             | 0           | -2.254356               | 2.780955  | -2.078643 |
| 44            | 1             | 0           | -3.725788               | 3.599243  | -1.529183 |
| 45            | 1             | 0           | -2.139691               | 4.302550  | -1.172859 |
| 46            | 6             | 0           | 2.625294                | -2.576026 | 0.069583  |
| 47            | 1             | 0           | 1.570496                | -2.377605 | 0.278755  |
| 48            | 6             | 0           | 3.168774                | -3.421602 | 1.237627  |
| 49            | 1             | 0           | 2.594781                | -4.350974 | 1.333319  |
| 50            | 1             | 0           | 4.219491                | -3.696316 | 1.087210  |
| 51            | 1             | 0           | 3.098561                | -2.879864 | 2.187401  |
| 52            | 6             | 0           | 2.691159                | -3.358050 | -1.256712 |
| 53            | 1             | 0           | 2.139513                | -4.302298 | -1.173157 |
| 54            | 1             | 0           | 2.254224                | -2.780523 | -2.078635 |
| 55            | 1             | 0           | 3.725642                | -3.599009 | -1.529427 |
| 56            | 6             | 0           | 2.625464                | 2.575994  | 0.069073  |
| 57            | 1             | 0           | 1.570695                | 2.377704  | 0.278520  |
| 58            | 6             | 0           | 3.169199                | 3.421855  | 1.236794  |

|    |   |   |          |          |           |
|----|---|---|----------|----------|-----------|
| 59 | 1 | 0 | 3.099281 | 2.880298 | 2.186691  |
| 60 | 1 | 0 | 4.219847 | 3.696629 | 1.086033  |
| 61 | 1 | 0 | 2.595135 | 4.351191 | 1.332429  |
| 62 | 6 | 0 | 2.691130 | 3.357691 | -1.257432 |
| 63 | 1 | 0 | 3.725591 | 3.598349 | -1.530495 |
| 64 | 1 | 0 | 2.253839 | 2.780063 | -2.079092 |
| 65 | 1 | 0 | 2.139716 | 4.302080 | -1.173944 |

4 B3LYP/6-31G(d)

Standard orientation:

| Center Number | Atomic Number | Atomic Type | Coordinates (Angstroms) |           |           |
|---------------|---------------|-------------|-------------------------|-----------|-----------|
|               |               |             | X                       | Y         | Z         |
| 1             | 14            | 0           | 0.000001                | 1.136845  | -0.000005 |
| 2             | 7             | 0           | 1.252544                | -0.094588 | 0.019323  |
| 3             | 7             | 0           | -1.252547               | -0.094599 | -0.019387 |
| 4             | 6             | 0           | 0.728996                | -1.446827 | -0.230897 |
| 5             | 6             | 0           | -0.728997               | -1.446826 | 0.230871  |
| 6             | 1             | 0           | 1.296463                | -2.215341 | 0.307444  |
| 7             | 1             | 0           | -1.296459               | -2.215357 | -0.307450 |
| 8             | 6             | 0           | 2.719175                | 0.093038  | 0.011477  |
| 9             | 6             | 0           | -2.719176               | 0.093038  | -0.011471 |
| 10            | 6             | 0           | 3.332260                | -0.470688 | -1.289632 |
| 11            | 1             | 0           | 2.887331                | 0.014633  | -2.165733 |
| 12            | 1             | 0           | 4.413490                | -0.292982 | -1.311406 |
| 13            | 1             | 0           | 3.174682                | -1.550744 | -1.380982 |
| 14            | 6             | 0           | 3.348776                | -0.616322 | 1.231939  |
| 15            | 1             | 0           | 3.167345                | -1.696372 | 1.217565  |
| 16            | 1             | 0           | 4.434889                | -0.467255 | 1.245407  |
| 17            | 1             | 0           | 2.933246                | -0.213701 | 2.161871  |
| 18            | 6             | 0           | 3.054370                | 1.591876  | 0.101106  |
| 19            | 1             | 0           | 2.631105                | 2.043309  | 1.005269  |
| 20            | 1             | 0           | 4.141522                | 1.725097  | 0.133682  |
| 21            | 1             | 0           | 2.669459                | 2.143537  | -0.763218 |
| 22            | 6             | 0           | -3.348897               | -0.616669 | -1.231667 |
| 23            | 1             | 0           | -4.434970               | -0.467319 | -1.245234 |
| 24            | 1             | 0           | -2.933225               | -0.214536 | -2.161747 |
| 25            | 1             | 0           | -3.167766               | -1.696764 | -1.216847 |
| 26            | 6             | 0           | -3.054356               | 1.591856  | -0.101532 |
| 27            | 1             | 0           | -4.141509               | 1.725091  | -0.134011 |
| 28            | 1             | 0           | -2.669335               | 2.143790  | 0.762568  |
| 29            | 1             | 0           | -2.631190               | 2.042985  | -1.005894 |
| 30            | 6             | 0           | -3.332150               | -0.470303 | 1.289856  |
| 31            | 1             | 0           | -4.413418               | -0.292818 | 1.311566  |
| 32            | 1             | 0           | -3.174344               | -1.550292 | 1.381621  |
| 33            | 1             | 0           | -2.887318               | 0.015445  | 2.165769  |
| 34            | 1             | 0           | -0.785443               | -1.692470 | 1.303444  |
| 35            | 1             | 0           | 0.785451                | -1.692493 | -1.303461 |

7a B3LYP/6-31G(d)

Standard orientation:

| Center Number | Atomic Number | Atomic Type | Coordinates (Angstroms) |           |           |
|---------------|---------------|-------------|-------------------------|-----------|-----------|
|               |               |             | X                       | Y         | Z         |
| 1             | 14            | 0           | -.392898                | .250410   | -.281446  |
| 2             | 14            | 0           | 1.644093                | -1.011705 | .211970   |
| 3             | 7             | 0           | -2.034254               | -.282330  | .011626   |
| 4             | 7             | 0           | -.800232                | 1.916756  | .078368   |
| 5             | 6             | 0           | -2.817250               | .814590   | .315421   |
| 6             | 6             | 0           | -2.150186               | 2.000897  | .356885   |
| 7             | 1             | 0           | -3.883422               | .710156   | .455267   |
| 8             | 1             | 0           | -2.620656               | 2.954789  | .538196   |
| 9             | 6             | 0           | -2.706929               | -1.622431 | -.151542  |
| 10            | 6             | 0           | .067765                 | 3.153878  | .076965   |
| 11            | 6             | 0           | -3.772334               | -1.519891 | -1.259421 |
| 12            | 1             | 0           | -3.319693               | -1.215175 | -2.208811 |
| 13            | 1             | 0           | -4.244604               | -2.496558 | -1.403054 |
| 14            | 1             | 0           | -4.564056               | -.806808  | -1.012071 |
| 15            | 6             | 0           | -3.343132               | -2.019829 | 1.193639  |
| 16            | 1             | 0           | -4.117601               | -1.313545 | 1.507251  |
| 17            | 1             | 0           | -3.811701               | -3.004504 | 1.101622  |
| 18            | 1             | 0           | -2.588028               | -2.071550 | 1.984981  |
| 19            | 6             | 0           | -1.666925               | -2.670183 | -.555757  |
| 20            | 1             | 0           | -.916813                | -2.819892 | .226190   |
| 21            | 1             | 0           | -2.163121               | -3.632172 | -.713529  |
| 22            | 1             | 0           | -1.168607               | -2.403721 | -1.494370 |
| 23            | 6             | 0           | -.765579                | 4.412143  | -.224457  |
| 24            | 1             | 0           | -.081779                | 5.254319  | -.364902  |
| 25            | 1             | 0           | -1.351231               | 4.299522  | -1.142595 |
| 26            | 1             | 0           | -1.436293               | 4.682851  | .596471   |
| 27            | 6             | 0           | 1.124387                | 2.997348  | -1.025445 |
| 28            | 1             | 0           | 1.808923                | 3.850879  | -1.010346 |
| 29            | 1             | 0           | 1.728856                | 2.097434  | -.885895  |
| 30            | 1             | 0           | .655592                 | 2.952874  | -2.013919 |
| 31            | 6             | 0           | .717852                 | 3.284286  | 1.466565  |
| 32            | 1             | 0           | 1.340067                | 4.183954  | 1.509349  |
| 33            | 1             | 0           | -.046020                | 3.362134  | 2.247071  |
| 34            | 1             | 0           | 1.352083                | 2.422344  | 1.697815  |
| 35            | 6             | 0           | 1.855448                | -2.357654 | -1.106296 |
| 36            | 1             | 0           | 2.872746                | -2.742678 | -.937331  |
| 37            | 1             | 0           | 1.188579                | -3.195408 | -.872345  |
| 38            | 6             | 0           | 1.703468                | -1.957184 | -2.584674 |
| 39            | 1             | 0           | 1.916047                | -2.809982 | -3.238023 |
| 40            | 1             | 0           | .685556                 | -1.619414 | -2.813985 |
| 41            | 1             | 0           | 2.387665                | -1.150754 | -2.865094 |
| 42            | 6             | 0           | 1.287525                | -1.707775 | 1.947375  |
| 43            | 1             | 0           | 1.244415                | -.863942  | 2.649281  |
| 44            | 1             | 0           | .294544                 | -2.171946 | 1.977531  |
| 45            | 6             | 0           | 2.346195                | -2.728903 | 2.418798  |
| 46            | 1             | 0           | 3.351973                | -2.295965 | 2.450956  |
| 47            | 1             | 0           | 2.112945                | -3.078071 | 3.430332  |
| 48            | 1             | 0           | 2.381156                | -3.609402 | 1.768143  |

|    |   |   |          |          |           |
|----|---|---|----------|----------|-----------|
| 49 | 6 | 0 | 3.156147 | .136724  | .309817   |
| 50 | 1 | 0 | 2.890782 | 1.083303 | .794389   |
| 51 | 1 | 0 | 3.801447 | -.374650 | 1.040420  |
| 52 | 6 | 0 | 3.971353 | .393183  | -.970885  |
| 53 | 1 | 0 | 4.337007 | -.541166 | -1.408225 |
| 54 | 1 | 0 | 3.393737 | .913249  | -1.742442 |
| 55 | 1 | 0 | 4.847358 | 1.011453 | -.747564  |

7c B3LYP/6-31G(d)

Standard orientation:

| Center Number | Atomic Number | Atomic Type | Coordinates (Angstroms) |           |           |
|---------------|---------------|-------------|-------------------------|-----------|-----------|
|               |               |             | X                       | Y         | Z         |
| 1             | 14            | 0           | -0.002712               | -0.026897 | 0.219703  |
| 2             | 14            | 0           | -0.087079               | -1.588937 | 2.063583  |
| 3             | 7             | 0           | 1.247490                | 0.441439  | -0.886720 |
| 4             | 7             | 0           | -1.246174               | 0.471860  | -0.880922 |
| 5             | 6             | 0           | 0.685604                | 1.004562  | -2.026693 |
| 6             | 6             | 0           | -0.676568               | 1.023295  | -2.022460 |
| 7             | 1             | 0           | 1.331075                | 1.396088  | -2.800969 |
| 8             | 1             | 0           | -1.315566               | 1.435654  | -2.791301 |
| 9             | 6             | 0           | 1.578682                | -1.474811 | 2.957477  |
| 10            | 1             | 0           | 1.437194                | -2.037812 | 3.892724  |
| 11            | 1             | 0           | 2.305703                | -2.055414 | 2.374127  |
| 12            | 6             | 0           | 2.155736                | -0.084397 | 3.271663  |
| 13            | 1             | 0           | 3.082776                | -0.173576 | 3.847818  |
| 14            | 1             | 0           | 2.399313                | 0.460672  | 2.353188  |
| 15            | 1             | 0           | 1.462574                | 0.528627  | 3.855469  |
| 16            | 6             | 0           | -0.321624               | -3.292103 | 1.259099  |
| 17            | 1             | 0           | -1.276339               | -3.308665 | 0.720054  |
| 18            | 1             | 0           | 0.460749                | -3.447839 | 0.505913  |
| 19            | 6             | 0           | -0.283355               | -4.440662 | 2.291709  |
| 20            | 1             | 0           | -1.073142               | -4.342819 | 3.044682  |
| 21            | 1             | 0           | -0.428730               | -5.404992 | 1.793138  |
| 22            | 1             | 0           | 0.677058                | -4.486172 | 2.816346  |
| 23            | 6             | 0           | -1.610967               | -1.087713 | 3.073515  |
| 24            | 1             | 0           | -2.457484               | -0.960286 | 2.385381  |
| 25            | 1             | 0           | -1.860181               | -1.976202 | 3.673017  |
| 26            | 6             | 0           | -1.485381               | 0.134335  | 3.999598  |
| 27            | 1             | 0           | -0.724332               | -0.019606 | 4.771511  |
| 28            | 1             | 0           | -1.219698               | 1.044236  | 3.448990  |
| 29            | 1             | 0           | -2.434008               | 0.328024  | 4.511521  |
| 30            | 6             | 0           | 2.689928                | 0.415673  | -0.713230 |
| 31            | 6             | 0           | 3.392962                | -0.768868 | -1.027073 |
| 32            | 6             | 0           | 4.782373                | -0.758864 | -0.852130 |
| 33            | 6             | 0           | 5.445687                | 0.375303  | -0.394371 |
| 34            | 6             | 0           | 4.730682                | 1.534630  | -0.111208 |
| 35            | 6             | 0           | 3.339787                | 1.589101  | -0.265330 |
| 36            | 1             | 0           | 5.355142                | -1.649800 | -1.089010 |
| 37            | 1             | 0           | 6.524463                | 0.359096  | -0.269093 |
| 38            | 1             | 0           | 5.262209                | 2.418050  | 0.228586  |
| 39            | 6             | 0           | -2.689378               | 0.473741  | -0.704794 |
| 40            | 6             | 0           | -3.304311               | 1.618855  | -0.150636 |
| 41            | 6             | 0           | -4.697705               | 1.596199  | -0.008710 |
| 42            | 6             | 0           | -5.447287               | 0.493569  | -0.404087 |
| 43            | 6             | 0           | -4.817321               | -0.614428 | -0.963076 |
| 44            | 6             | 0           | -3.428013               | -0.653550 | -1.132043 |
| 45            | 1             | 0           | -5.202700               | 2.460667  | 0.410891  |
| 46            | 1             | 0           | -6.527006               | 0.500853  | -0.286172 |
| 47            | 1             | 0           | -5.416869               | -1.460602 | -1.282023 |
| 48            | 6             | 0           | 2.716185                | -2.006571 | -1.611566 |
| 49            | 1             | 0           | 1.635306                | -1.911702 | -1.457143 |
| 50            | 6             | 0           | 2.607723                | 2.904777  | -0.004337 |
| 51            | 1             | 0           | 1.529713                | 2.709077  | -0.017335 |
| 52            | 6             | 0           | 3.162149                | -3.313888 | -0.930946 |
| 53            | 1             | 0           | 3.038158                | -3.270230 | 0.157446  |
| 54            | 1             | 0           | 2.571193                | -4.155335 | -1.309574 |
| 55            | 1             | 0           | 4.213454                | -3.543902 | -1.133276 |
| 56            | 6             | 0           | 2.947360                | -2.080166 | -3.135945 |
| 57            | 1             | 0           | 2.431952                | -2.948915 | -3.560802 |
| 58            | 1             | 0           | 2.574959                | -1.183076 | -3.642211 |
| 59            | 1             | 0           | 4.014266                | -2.174697 | -3.366875 |
| 60            | 6             | 0           | 2.901730                | 3.922166  | -1.127539 |
| 61            | 1             | 0           | 2.626270                | 3.531418  | -2.113123 |
| 62            | 1             | 0           | 2.340254                | 4.848131  | -0.960735 |
| 63            | 1             | 0           | 3.967022                | 4.176319  | -1.158514 |
| 64            | 6             | 0           | 2.939576                | 3.514057  | 1.371474  |
| 65            | 1             | 0           | 2.732745                | 2.814389  | 2.188042  |
| 66            | 1             | 0           | 3.991195                | 3.810775  | 1.444276  |
| 67            | 1             | 0           | 2.336799                | 4.414040  | 1.535591  |
| 68            | 6             | 0           | -2.779508               | -1.851259 | -1.822715 |
| 69            | 1             | 0           | -1.713319               | -1.854941 | -1.566747 |
| 70            | 6             | 0           | -2.878880               | -1.713638 | -3.357486 |
| 71            | 1             | 0           | -2.389985               | -2.561418 | -3.850570 |
| 72            | 1             | 0           | -3.926309               | -1.694257 | -3.678605 |
| 73            | 1             | 0           | -2.403014               | -0.794328 | -3.714597 |
| 74            | 6             | 0           | -3.363817               | -3.202323 | -1.370945 |
| 75            | 1             | 0           | -2.765235               | -4.023502 | -1.780011 |
| 76            | 1             | 0           | -3.378847               | -3.299011 | -0.279469 |
| 77            | 1             | 0           | -4.388893               | -3.345578 | -1.728716 |
| 78            | 6             | 0           | -2.534056               | 2.879502  | 0.237088  |
| 79            | 1             | 0           | -1.462538               | 2.650248  | 0.218273  |
| 80            | 6             | 0           | -2.775963               | 4.004008  | -0.792132 |
| 81            | 1             | 0           | -2.491692               | 3.695074  | -1.803909 |
| 82            | 1             | 0           | -3.832449               | 4.293097  | -0.817848 |
| 83            | 1             | 0           | -2.190782               | 4.893020  | -0.531552 |
| 84            | 6             | 0           | -2.868842               | 3.366994  | 1.659418  |
| 85            | 1             | 0           | -3.905904               | 3.709556  | 1.740220  |
| 86            | 1             | 0           | -2.721094               | 2.577591  | 2.404122  |
| 87            | 1             | 0           | -2.226693               | 4.213380  | 1.926793  |

7d B3LYP/6-31G(d)

Standard orientation:

| Center Number | Atomic Number | Atomic Type | Coordinates (Angstroms) |           |           |
|---------------|---------------|-------------|-------------------------|-----------|-----------|
|               |               |             | X                       | Y         | Z         |
| 1             | 14            | 0           | -0.823643               | 0.045303  | -0.442810 |
| 2             | 14            | 0           | 1.603318                | -0.169674 | 0.055410  |
| 3             | 7             | 0           | -2.031420               | -1.157129 | -0.003345 |
| 4             | 7             | 0           | -1.917353               | 1.366073  | -0.039910 |
| 5             | 6             | 0           | -3.193508               | -0.514993 | 0.373760  |
| 6             | 6             | 0           | -3.130421               | 0.844537  | 0.359815  |
| 7             | 1             | 0           | -4.087494               | -1.077415 | 0.601056  |
| 8             | 1             | 0           | -3.965972               | 1.490096  | 0.581797  |
| 9             | 6             | 0           | -2.075066               | -2.660532 | -0.140298 |
| 10            | 6             | 0           | -1.740372               | 2.864968  | -0.142443 |
| 11            | 6             | 0           | -3.137013               | -3.037232 | -1.191539 |
| 12            | 1             | 0           | -2.901117               | -2.587188 | -2.161645 |
| 13            | 1             | 0           | -3.159862               | -4.124484 | -1.315340 |
| 14            | 1             | 0           | -4.142246               | -2.718745 | -0.901255 |
| 15            | 6             | 0           | -2.413952               | -3.272523 | 1.232312  |
| 16            | 1             | 0           | -3.401953               | -2.968508 | 1.590063  |
| 17            | 1             | 0           | -2.414042               | -4.364279 | 1.155735  |
| 18            | 1             | 0           | -1.673876               | -2.982306 | 1.985444  |
| 19            | 6             | 0           | -0.713057               | -3.179454 | -0.602811 |
| 20            | 1             | 0           | 0.065442                | -2.985240 | 0.139722  |
| 21            | 1             | 0           | -0.766225               | -4.263504 | -0.738724 |
| 22            | 1             | 0           | -0.418814               | -2.745360 | -1.564221 |
| 23            | 6             | 0           | -3.082211               | 3.559911  | -0.440301 |
| 24            | 1             | 0           | -2.882709               | 4.610900  | -0.669066 |
| 25            | 1             | 0           | -3.583110               | 3.117219  | -1.307362 |
| 26            | 1             | 0           | -3.767856               | 3.548129  | 0.412292  |
| 27            | 6             | 0           | -0.781889               | 3.161391  | -1.301972 |
| 28            | 1             | 0           | -0.594646               | 4.237713  | -1.364572 |
| 29            | 1             | 0           | 0.185344                | 2.675315  | -1.163152 |
| 30            | 1             | 0           | -1.206486               | 2.833402  | -2.256663 |
| 31            | 6             | 0           | -1.177094               | 3.378293  | 1.194955  |
| 32            | 1             | 0           | -1.072072               | 4.467632  | 1.164837  |
| 33            | 1             | 0           | -1.848024               | 3.125053  | 2.022445  |
| 34            | 1             | 0           | -0.193822               | 2.948436  | 1.410487  |
| 35            | 6             | 0           | 2.332120                | -1.427059 | -1.199245 |
| 36            | 1             | 0           | 1.963668                | -2.407533 | -0.871171 |
| 37            | 6             | 0           | 1.894162                | -1.224811 | -2.664087 |
| 38            | 1             | 0           | 2.294256                | -2.031393 | -3.290351 |
| 39            | 1             | 0           | 0.804698                | -1.225629 | -2.787566 |
| 40            | 1             | 0           | 2.269009                | -0.281617 | -3.073803 |
| 41            | 6             | 0           | 1.459720                | -0.876412 | 1.844161  |
| 42            | 1             | 0           | 0.713696                | -1.680677 | 1.772110  |
| 43            | 6             | 0           | 2.762894                | -1.531956 | 2.354173  |
| 44            | 1             | 0           | 3.589279                | -0.818060 | 2.427611  |
| 45            | 1             | 0           | 2.598006                | -1.940515 | 3.358912  |
| 46            | 1             | 0           | 3.086473                | -2.360784 | 1.716912  |
| 47            | 6             | 0           | 2.408986                | 1.573367  | -0.033451 |
| 48            | 1             | 0           | 1.684627                | 2.275226  | 0.401154  |
| 49            | 6             | 0           | 2.745971                | 2.055423  | -1.461534 |
| 50            | 1             | 0           | 3.571452                | 1.479092  | -1.890537 |
| 51            | 1             | 0           | 1.906079                | 1.989316  | -2.160617 |
| 52            | 1             | 0           | 3.068239                | 3.103371  | -1.433863 |
| 53            | 6             | 0           | 0.917649                | 0.148067  | 2.860975  |
| 54            | 1             | 0           | -0.054038               | 0.560502  | 2.563145  |
| 55            | 1             | 0           | 0.781797                | -0.328485 | 3.839301  |
| 56            | 1             | 0           | 1.605131                | 0.988621  | 3.005861  |
| 57            | 6             | 0           | 3.679509                | 1.650972  | 0.848792  |
| 58            | 1             | 0           | 4.452751                | 0.948906  | 0.519982  |
| 59            | 1             | 0           | 4.108136                | 2.658351  | 0.779697  |
| 60            | 1             | 0           | 3.473109                | 1.457584  | 1.904824  |
| 61            | 6             | 0           | 3.877868                | -1.482301 | -1.115677 |
| 62            | 1             | 0           | 4.247918                | -2.292480 | -1.755513 |
| 63            | 1             | 0           | 4.339057                | -0.555879 | -1.471463 |
| 64            | 1             | 0           | 4.246395                | -1.674139 | -0.103636 |

7f B3LYP/6-31G(d)

Standard orientation:

| Center Number | Atomic Number | Atomic Type | Coordinates (Angstroms) |           |           |
|---------------|---------------|-------------|-------------------------|-----------|-----------|
|               |               |             | X                       | Y         | Z         |
| 1             | 14            | 0           | -0.004916               | -0.075478 | 0.008008  |
| 2             | 14            | 0           | 0.114626                | 2.326468  | -0.422119 |
| 3             | 7             | 0           | -1.247180               | -1.267459 | 0.194953  |
| 4             | 7             | 0           | 1.245779                | -1.248060 | 0.271069  |
| 5             | 6             | 0           | -0.677661               | -2.514181 | 0.446447  |
| 6             | 6             | 0           | 0.680966                | -2.502608 | 0.491599  |
| 7             | 1             | 0           | -1.319443               | -3.374116 | 0.581334  |
| 8             | 1             | 0           | 1.325389                | -3.351077 | 0.675995  |
| 9             | 6             | 0           | -1.619627               | 2.820224  | -1.062043 |
| 10            | 1             | 0           | -1.852433               | 2.089792  | -1.850900 |
| 11            | 6             | 0           | -2.741401               | 2.750801  | -0.008073 |
| 12            | 1             | 0           | -3.707292               | 2.977948  | -0.475380 |
| 13            | 1             | 0           | -2.832154               | 1.761786  | 0.452922  |
| 14            | 1             | 0           | -2.589433               | 3.486092  | 0.790189  |
| 15            | 6             | 0           | 1.475965                | 2.353391  | -1.772502 |
| 16            | 1             | 0           | 2.242664                | 1.641207  | -1.430757 |
| 17            | 6             | 0           | 2.175114                | 3.725262  | -1.906816 |
| 18            | 1             | 0           | 2.657085                | 4.038622  | -0.975172 |
| 19            | 1             | 0           | 2.957185                | 3.665899  | -2.673621 |
| 20            | 1             | 0           | 1.481919                | 4.516444  | -2.213653 |
| 21            | 6             | 0           | 0.688784                | 3.099005  | 1.235719  |
| 22            | 1             | 0           | 1.760604                | 2.853485  | 1.293205  |
| 23            | 6             | 0           | 0.007715                | 2.543698  | 2.501439  |
| 24            | 1             | 0           | -1.069565               | 2.740293  | 2.502344  |
| 25            | 1             | 0           | 0.150765                | 1.463211  | 2.620165  |
| 26            | 1             | 0           | 0.426095                | 3.023878  | 3.394398  |
| 27            | 6             | 0           | -2.691371               | -1.134908 | 0.110327  |
| 28            | 6             | 0           | -3.313048               | -1.238877 | -1.154569 |

|    |   |   |           |           |           |
|----|---|---|-----------|-----------|-----------|
| 29 | 6 | 0 | -4.707950 | -1.119664 | -1.198563 |
| 30 | 6 | 0 | -5.454379 | -0.918102 | -0.041657 |
| 31 | 6 | 0 | -4.818246 | -0.840724 | 1.193620  |
| 32 | 6 | 0 | -3.426145 | -0.948912 | 1.303550  |
| 33 | 1 | 0 | -5.218621 | -1.198712 | -2.153414 |
| 34 | 1 | 0 | -6.535690 | -0.832853 | -0.101509 |
| 35 | 1 | 0 | -5.413297 | -0.700446 | 2.090745  |
| 36 | 6 | 0 | 2.692030  | -1.094117 | 0.266481  |
| 37 | 6 | 0 | 3.346175  | -0.747013 | 1.470538  |
| 38 | 6 | 0 | 4.740936  | -0.621898 | 1.435420  |
| 39 | 6 | 0 | 5.458110  | -0.843303 | 0.264320  |
| 40 | 6 | 0 | 4.792402  | -1.209707 | -0.901220 |
| 41 | 6 | 0 | 3.399075  | -1.348934 | -0.932022 |
| 42 | 1 | 0 | 5.274523  | -0.359625 | 2.343337  |
| 43 | 1 | 0 | 6.539798  | -0.743111 | 0.262911  |
| 44 | 1 | 0 | 5.365782  | -1.399155 | -1.802891 |
| 45 | 6 | 0 | -2.547041 | -1.541654 | -2.440791 |
| 46 | 1 | 0 | -1.476126 | -1.421920 | -2.241559 |
| 47 | 6 | 0 | -2.776133 | -0.915179 | 2.685541  |
| 48 | 1 | 0 | -1.692295 | -0.826221 | 2.552098  |
| 49 | 6 | 0 | -2.904972 | -0.582067 | -3.591146 |
| 50 | 1 | 0 | -2.768463 | 0.466737  | -3.303295 |
| 51 | 1 | 0 | -2.267692 | -0.782289 | -4.459631 |
| 52 | 1 | 0 | -3.943568 | -0.702820 | -3.916986 |
| 53 | 6 | 0 | -2.765523 | -3.008670 | -2.868218 |
| 54 | 1 | 0 | -2.182340 | -3.236688 | -3.767629 |
| 55 | 1 | 0 | -2.462247 | -3.706467 | -2.080121 |
| 56 | 1 | 0 | -3.820689 | -3.199479 | -3.094123 |
| 57 | 6 | 0 | -3.036304 | -2.234122 | 3.443931  |
| 58 | 1 | 0 | -2.668882 | -3.102214 | 2.885908  |
| 59 | 1 | 0 | -2.534370 | -2.220125 | 4.417977  |
| 60 | 1 | 0 | -4.107775 | -2.381649 | 3.620102  |
| 61 | 6 | 0 | -3.231763 | 0.290204  | 3.529569  |
| 62 | 1 | 0 | -3.072068 | 1.237714  | 3.003677  |
| 63 | 1 | 0 | -4.293801 | 0.228867  | 3.790042  |
| 64 | 1 | 0 | -2.669372 | 0.323095  | 4.469276  |
| 65 | 6 | 0 | 2.720036  | -1.826967 | -2.214501 |
| 66 | 1 | 0 | 1.648495  | -1.608702 | -2.136364 |
| 67 | 6 | 0 | 2.867236  | -3.356050 | -2.372946 |
| 68 | 1 | 0 | 2.354737  | -3.696839 | -3.279705 |
| 69 | 1 | 0 | 3.922807  | -3.638420 | -2.455779 |
| 70 | 1 | 0 | 2.443448  | -3.898495 | -1.521465 |
| 71 | 6 | 0 | 3.243097  | -1.113837 | -3.475417 |
| 72 | 1 | 0 | 2.634100  | -1.393218 | -4.342169 |
| 73 | 1 | 0 | 3.209714  | -0.024679 | -3.371306 |
| 74 | 1 | 0 | 4.276228  | -1.396053 | -3.704837 |
| 75 | 6 | 0 | 2.612203  | -0.591560 | 2.800542  |
| 76 | 1 | 0 | 1.544565  | -0.461941 | 2.590145  |
| 77 | 6 | 0 | 2.754341  | -1.874839 | 3.647515  |
| 78 | 1 | 0 | 2.371415  | -2.753753 | 3.117797  |
| 79 | 1 | 0 | 3.804985  | -2.065476 | 3.893738  |
| 80 | 1 | 0 | 2.199542  | -1.776797 | 4.587583  |
| 81 | 6 | 0 | 3.071543  | 0.637410  | 3.606380  |
| 82 | 1 | 0 | 4.101413  | 0.531544  | 3.963254  |
| 83 | 1 | 0 | 3.017501  | 1.557086  | 3.013252  |
| 84 | 1 | 0 | 2.436428  | 0.762961  | 4.490018  |
| 85 | 6 | 0 | -1.598693 | 4.217537  | -1.728454 |
| 86 | 1 | 0 | -2.586156 | 4.432955  | -2.154567 |
| 87 | 1 | 0 | -1.378642 | 5.010766  | -1.006404 |
| 88 | 1 | 0 | -0.870329 | 4.291490  | -2.541890 |
| 89 | 6 | 0 | 0.561372  | 4.641589  | 1.211705  |
| 90 | 1 | 0 | 1.033234  | 5.063574  | 2.107417  |
| 91 | 1 | 0 | 1.041366  | 5.102164  | 0.343030  |
| 92 | 1 | 0 | -0.488618 | 4.954138  | 1.222484  |
| 93 | 6 | 0 | 0.954669  | 1.865582  | -3.139040 |
| 94 | 1 | 0 | 0.517834  | 0.859994  | -3.090507 |
| 95 | 1 | 0 | 0.192491  | 2.537524  | -3.547828 |
| 96 | 1 | 0 | 1.774042  | 1.827995  | -3.866449 |

8a B3LYP/6-31G(d)

Standard orientation:

| Center Number | Atomic Number | Atomic Type | Coordinates (Angstroms) |           |           |
|---------------|---------------|-------------|-------------------------|-----------|-----------|
|               |               |             | X                       | Y         | Z         |
| 1             | 14            | 0           | .395956                 | .282543   | .064511   |
| 2             | 14            | 0           | -1.596384               | -1.125342 | -.192435  |
| 3             | 7             | 0           | 2.028167                | -.201771  | .013682   |
| 4             | 7             | 0           | .639874                 | 1.964681  | -.087942  |
| 5             | 6             | 0           | 2.881556                | 1.015622  | -.033937  |
| 6             | 6             | 0           | 2.035460                | 2.184459  | -.546562  |
| 7             | 1             | 0           | 3.736863                | .854812   | -.695316  |
| 8             | 1             | 0           | 2.431785                | 3.118938  | -.148636  |
| 9             | 6             | 0           | 2.739613                | -1.514116 | .140351   |
| 10            | 6             | 0           | -.326325                | 3.110834  | -.101879  |
| 11            | 6             | 0           | 3.868554                | -1.399904 | 1.185454  |
| 12            | 1             | 0           | 3.478735                | -1.073949 | 2.156044  |
| 13            | 1             | 0           | 4.332365                | -2.381547 | 1.321025  |
| 14            | 1             | 0           | 4.658498                | -.709366  | .877258   |
| 15            | 6             | 0           | 3.321740                | -1.902109 | -1.233723 |
| 16            | 1             | 0           | 4.029898                | -1.153394 | -1.603042 |
| 17            | 1             | 0           | 3.859504                | -2.853007 | -1.160716 |
| 18            | 1             | 0           | 2.525895                | -2.014438 | -1.977852 |
| 19            | 6             | 0           | 1.761522                | -2.596333 | .608777   |
| 20            | 1             | 0           | .957227                 | -2.758278 | -.113687  |
| 21            | 1             | 0           | 2.289696                | -3.548536 | .715004   |
| 22            | 1             | 0           | 1.328501                | -2.347386 | 1.583892  |
| 23            | 6             | 0           | .380999                 | 4.419866  | .297087   |
| 24            | 1             | 0           | -.373004                | 5.202432  | .424587   |
| 25            | 1             | 0           | .915022                 | 4.313174  | 1.247513  |
| 26            | 1             | 0           | 1.081211                | 4.771633  | -.466533  |
| 27            | 6             | 0           | -1.415134               | 2.827796  | .943103   |
| 28            | 1             | 0           | -2.168516               | 3.621341  | .930634   |
| 29            | 1             | 0           | -1.935742               | 1.888198  | .744597   |



|    |   |   |           |           |           |
|----|---|---|-----------|-----------|-----------|
| 30 | 1 | 0 | -.984095  | 2.781612  | 1.948985  |
| 31 | 6 | 0 | -.931566  | 3.263308  | -1.511051 |
| 32 | 1 | 0 | -1.624892 | 4.110214  | -1.543660 |
| 33 | 1 | 0 | -.151413  | 3.444395  | -2.258313 |
| 34 | 1 | 0 | -1.482860 | 2.363972  | -1.807925 |
| 35 | 6 | 0 | -1.716644 | -2.261744 | 1.322095  |
| 36 | 1 | 0 | -2.724667 | -2.698654 | 1.270208  |
| 37 | 1 | 0 | -1.027350 | -3.104151 | 1.197202  |
| 38 | 6 | 0 | -1.513766 | -1.613489 | 2.703838  |
| 39 | 1 | 0 | -1.660848 | -2.348707 | 3.501924  |
| 40 | 1 | 0 | -.499047  | -1.211329 | 2.819582  |
| 41 | 1 | 0 | -2.216882 | -.793815  | 2.881865  |
| 42 | 6 | 0 | -1.216695 | -2.029460 | -1.826821 |
| 43 | 1 | 0 | -1.314057 | -1.299314 | -2.642231 |
| 44 | 1 | 0 | -.180811  | -2.384838 | -1.863702 |
| 45 | 6 | 0 | -2.174470 | -3.215904 | -2.073579 |
| 46 | 1 | 0 | -3.224315 | -2.902789 | -2.090485 |
| 47 | 1 | 0 | -1.961395 | -3.681956 | -3.041396 |
| 48 | 1 | 0 | -2.068292 | -3.989105 | -1.305292 |
| 49 | 6 | 0 | -3.179477 | -.099147  | -.454607  |
| 50 | 1 | 0 | -2.955006 | .846014   | -.962407  |
| 51 | 1 | 0 | -3.730611 | -.689731  | -1.202032 |
| 52 | 6 | 0 | -4.098829 | .142638   | .756460   |
| 53 | 1 | 0 | -4.402285 | -.798507  | 1.225755  |
| 54 | 1 | 0 | -3.626821 | .758618   | 1.528590  |
| 55 | 1 | 0 | -5.012641 | .658106   | .442431   |
| 56 | 1 | 0 | 2.066131  | 2.242721  | -1.643775 |
| 57 | 1 | 0 | 3.264694  | 1.231534  | .970639   |

8b B3LYP/6-31G(d)

Standard orientation:

| Center Number | Atomic Number | Atomic Type | Coordinates (Angstroms) |           |           |
|---------------|---------------|-------------|-------------------------|-----------|-----------|
|               |               |             | X                       | Y         | Z         |
| 1             | 14            | 0           | -0.833706               | 0.069381  | -0.230867 |
| 2             | 14            | 0           | 1.629894                | -0.205358 | 0.048564  |
| 3             | 7             | 0           | -2.039493               | -1.132802 | -0.063322 |
| 4             | 7             | 0           | -1.856816               | 1.436699  | -0.078506 |
| 5             | 6             | 0           | -3.365536               | -0.460548 | -0.010165 |
| 6             | 6             | 0           | -3.157356               | 0.972752  | 0.467266  |
| 7             | 1             | 0           | -4.034593               | -0.989899 | 0.672433  |
| 8             | 1             | 0           | -3.976062               | 1.595283  | 0.107136  |
| 9             | 6             | 0           | -2.076832               | -2.630881 | -0.104689 |
| 10            | 6             | 0           | -1.590998               | 2.913592  | -0.139640 |
| 11            | 6             | 0           | -3.110291               | -3.098611 | -1.151036 |
| 12            | 1             | 0           | -2.879545               | -2.691716 | -2.141825 |
| 13            | 1             | 0           | -3.084969               | -4.190409 | -1.219840 |
| 14            | 1             | 0           | -4.133518               | -2.815610 | -0.889094 |
| 15            | 6             | 0           | -2.451019               | -3.163819 | 1.293676  |
| 16            | 1             | 0           | -3.433036               | -2.810041 | 1.622853  |
| 17            | 1             | 0           | -2.488126               | -4.257930 | 1.278881  |
| 18            | 1             | 0           | -1.709690               | -2.856796 | 2.039224  |
| 19            | 6             | 0           | -0.709260               | -3.188397 | -0.502791 |
| 20            | 1             | 0           | 0.060144                | -2.934979 | 0.231152  |
| 21            | 1             | 0           | -0.758095               | -4.280318 | -0.548831 |
| 22            | 1             | 0           | -0.403647               | -2.829844 | -1.490684 |
| 23            | 6             | 0           | -2.885154               | 3.687952  | -0.459226 |
| 24            | 1             | 0           | -2.626909               | 4.733618  | -0.651732 |
| 25            | 1             | 0           | -3.376485               | 3.296534  | -1.356522 |
| 26            | 1             | 0           | -3.599718               | 3.682963  | 0.369272  |
| 27            | 6             | 0           | -0.599415               | 3.178198  | -1.279157 |
| 28            | 1             | 0           | -0.349894               | 4.242741  | -1.326964 |
| 29            | 1             | 0           | 0.335981                | 2.636677  | -1.134802 |
| 30            | 1             | 0           | -1.028037               | 2.884346  | -2.243388 |
| 31            | 6             | 0           | -1.030322               | 3.399948  | 1.211201  |
| 32            | 1             | 0           | -0.880088               | 4.484597  | 1.197188  |
| 33            | 1             | 0           | -1.721891               | 3.171099  | 2.029447  |
| 34            | 1             | 0           | -0.067448               | 2.930190  | 1.439625  |
| 35            | 6             | 0           | 2.252148                | -1.468995 | -1.255151 |
| 36            | 1             | 0           | 1.873439                | -2.442604 | -0.921642 |
| 37            | 6             | 0           | 1.730901                | -1.225358 | -2.686105 |
| 38            | 1             | 0           | 2.077785                | -2.022950 | -3.354130 |
| 39            | 1             | 0           | 0.635318                | -1.210734 | -2.741656 |
| 40            | 1             | 0           | 2.094777                | -0.278526 | -3.097125 |
| 41            | 6             | 0           | 1.533215                | -0.920805 | 1.838863  |
| 42            | 1             | 0           | 0.772876                | -1.713519 | 1.792524  |
| 43            | 6             | 0           | 2.840426                | -1.603132 | 2.300571  |
| 44            | 1             | 0           | 3.678889                | -0.902697 | 2.361698  |
| 45            | 1             | 0           | 2.698104                | -2.026888 | 3.302342  |
| 46            | 1             | 0           | 3.132511                | -2.425068 | 1.639655  |
| 47            | 6             | 0           | 2.495277                | 1.507826  | -0.051794 |
| 48            | 1             | 0           | 1.804348                | 2.234191  | 0.396020  |
| 49            | 6             | 0           | 2.829732                | 1.982473  | -1.483727 |
| 50            | 1             | 0           | 3.633409                | 1.383262  | -1.922081 |
| 51            | 1             | 0           | 1.981811                | 1.944665  | -2.174433 |
| 52            | 1             | 0           | 3.182922                | 3.020270  | -1.456347 |
| 53            | 1             | 0           | -3.147289               | 1.027011  | 1.565539  |
| 54            | 1             | 0           | -3.820801               | -0.469130 | -1.008170 |
| 55            | 6             | 0           | 3.797091                | -1.576061 | -1.262878 |
| 56            | 1             | 0           | 4.272683                | -0.659122 | -1.623619 |
| 57            | 1             | 0           | 4.214300                | -1.806241 | -0.277937 |
| 58            | 1             | 0           | 4.100728                | -2.383685 | -1.939924 |
| 59            | 6             | 0           | 3.784107                | 1.539173  | 0.806787  |
| 60            | 1             | 0           | 4.249082                | 2.529186  | 0.724811  |
| 61            | 1             | 0           | 3.591088                | 1.358189  | 1.867372  |
| 62            | 1             | 0           | 4.524111                | 0.807343  | 0.466170  |
| 63            | 6             | 0           | 1.043929                | 0.106475  | 2.880328  |
| 64            | 1             | 0           | 0.067991                | 0.538892  | 2.623195  |
| 65            | 1             | 0           | 0.934093                | -0.373423 | 3.860187  |
| 66            | 1             | 0           | 1.747128                | 0.936783  | 3.005065  |
